# Supplementary material for: Neutral copper–phosphido-borane complexes: synthesis, characterization, and use as precatalysts in Csp–P bond formation
Source: Royal Society of Chemistry journal article supplement (doi:10.1039/c2cc30723e), 2012-01-01
Supplement: c2cc30723e.pdf [file c2cc30723e.pdf]

# Neutral copper-phosphido-borane complexes: Synthesis, characterization, and use as precatalysts in Csp-P bond formation

Ibrahim Abdellah,<sup>a</sup> Elise Bernoud,<sup>a</sup> Jean-François Lohier,<sup>a</sup> Carole Alayrac,<sup>a</sup> Loïc Toupet,<sup>b</sup> Christine Lepetit<sup>c,d</sup> and Annie-Claude Gaumont<sup>\*a</sup>

<sup>a</sup> *Laboratoire de Chimie Moléculaire et Thio-organique, UMR CNRS 6507, INC3M, FR 3038, ENSICAEN & Université de Caen, 6 boulevard du Maréchal Juin, 14050 Caen, France.*  
[annie-claude.gaumont@ensicaen.fr](mailto:annie-claude.gaumont@ensicaen.fr)

<sup>b</sup> Institut de Physique de Rennes, UMR CNRS 6251, Université de Rennes 1, 263 avenue du Général Leclerc 35042 Rennes, France. [loic.toupet@univ-rennes1.fr](mailto:loic.toupet@univ-rennes1.fr)

<sup>c</sup> *CNRS ; LCC (Laboratoire de Chimie de Coordination) ; 205, route de Narbonne, F-31077 Toulouse, France. Fax: +33 5 61 55 30 03; Tel.: +33 5 61 33 36; E-mail: [christine.lepetit@lcc-toulouse.fr](mailto:christine.lepetit@lcc-toulouse.fr)*

<sup>d</sup> *Université de Toulouse ; UPS, INPT ; LCC ; F-31077 Toulouse, France.*

## Supporting Information

### Table of contents

- (I) General remarks
- (II) Synthesis and characterization of complexes [R<sub>2</sub>PHCuXphen]
  - Complex [Ph<sub>2</sub>PHCuIphen] (**3a**)
  - Complex [Et<sub>2</sub>PHCuIphen] (**3b**)
- (III) Synthesis and characterization of complexes [R<sub>2</sub>PHCuPPh<sub>2</sub>BH<sub>3</sub>phen]
  - Complex [Ph<sub>2</sub>PHCuPPh<sub>2</sub>BH<sub>3</sub>phen] (**4a**)
  - Complex [Et<sub>2</sub>PHCuPPh<sub>2</sub>BH<sub>3</sub>phen] (**4b**)
- (IV) Synthesis of alkynylphosphine **6** using a catalytic amount of complex **4a** or **4b**
- (V) NMR Spectra
- (VI) Theoretical studies

## (I) General remarks

Toluene, diethyl ether, dichloromethane and THF were purified by an Innovative Technology Pure Solv. Device (activated alumina column containing a copper catalyst and molecular sieves) and degassed. Chromatographic purifications were conducted using Merck silica gel Si 60 (40-63  $\mu\text{m}$ ) and TLC were performed on silica gel 60-F<sub>254</sub> plates (0.1 mm) with UV or  $\text{KMnO}_4$  detection.  $^1\text{H}$ ,  $^{13}\text{C}$ ,  $^{31}\text{P}$  NMR spectra were recorded on a BRUKER AVANCE III 400 or 500 spectrometer.  $^{11}\text{B}$  NMR spectrum was obtained on a 500 spectrometer.  $^1\text{H}$  and  $^{13}\text{C}$  NMR chemical shifts are reported in ppm using the residual peak of chloroform-*d* (7.26 and 77.16 ppm) or dichloromethane-*d*<sub>2</sub> (5.32 and 53.84 ppm) as internal standard.  $^{31}\text{P}$  and  $^{11}\text{B}$  NMR chemical shifts are reported relative to respectively  $\text{H}_3\text{PO}_4$  (85%) and  $\text{BF}_3\cdot\text{Et}_2\text{O}$  used as external references. Coupling constants are reported in Hertz (Hz). Abbreviations are used as follows: s = singlet, d = doublet, t = triplet, quint = quintuplet, sext = sextuplet, m = multiplet, br = broad. High Resolution Mass Spectrometry was performed on a Varian MAT 311 spectrometer. IR spectra were recorded on Spectrum One Perkin Elmer spectrometer and only the strongest or structurally most important peaks are listed.

## (II) Synthesis and characterization of complexes [ $\text{R}_2\text{PHCuXphen}$ ]

### Complex [ $\text{Ph}_2\text{PHCuIphen}$ ] (3a):

In a Schlenk tube, flushed with nitrogen, CuI (438 mg, 2.3 mmol, 1 equiv.), 1,10-phenanthroline (414 mg, 2.3 mmol, 1 equiv.) and diphenylphosphine (0.4 mL, 2.3 mmol, 1 equiv.) were dissolved in degassed dry dichloromethane (40 mL) at  $-78^\circ\text{C}$ . The reaction mixture was stirred at room temperature for 2 hours. After evaporation of the solvent, the solid residue was washed with diethyl ether (20 mL) and pentane (20 mL) affording an orange solid (1.2 g, 94% yield). Recrystallization at  $-20^\circ\text{C}$  from  $\text{CHCl}_3/\text{Et}_2\text{O}$  gave orange crystals.  $\text{Mp} = 150^\circ\text{C}$  (dec.)

$^1\text{H}$  NMR (500 MHz,  $\text{CDCl}_3$ )  $\delta$  8.98 (br, 2 H), 8.34 (br, 2 H), 7.86 (br, 2 H), 7.68–7.61 (m, 6 H), 7.35–7.27 (m, 6 H), 6.02 (d,  $^1J_{\text{PH}} = 312.0$  Hz, 1 H).

$^{13}\text{C}$  NMR (125 MHz,  $\text{CDCl}_3$ )  $\delta$  150.0, 143.4, 136.4, 133.8 (d,  $^2J_{\text{CP}} = 10.9$  Hz), 131.4 (d,  $^1J_{\text{CP}} = 28.6$  Hz), 129.6, 129.2, 128.8, 126.8, 124.7.

$^{31}\text{P}$  NMR (202 MHz,  $\text{CDCl}_3$ )  $\delta$   $-32.2$  (br).

IR (neat): 3041, 2308, 1508, 1480, 1435, 1422, 1141, 1095, 913, 842, 727, 693  $\text{cm}^{-1}$ .

HRMS (ESI) Calcd for  $\text{C}_{24}\text{H}_{19}\text{N}_2\text{PCu}$  [ $\text{M}-\text{I}$ ]<sup>+</sup>: 429.0582. Found: 429.0584.

Anal. Calcd for C<sub>24</sub>H<sub>19</sub>CuIN<sub>2</sub>P: C, 51.77; H, 3.44; N, 5.03. Found: C, 51.87; H, 3.68; N, 5.04.

Crystallographic data of **complex [Ph<sub>2</sub>PHCuIphen] (3a)**: Xcalibur-Saphire II Oxford Diffraction diffractometer (MoK $\alpha$   $\lambda$ =0.71073 Å; graphite monochromator;  $T$ =140(2) K. Formula C<sub>195.5</sub>H<sub>155.5</sub>Cl<sub>10.50</sub>Cu<sub>8</sub>I<sub>8</sub>N<sub>16</sub>P<sub>8</sub>, formula weight 4872.36, crystal system triclinic, space group  $P$ -1, crystal dimensions 0.18 x 0.11 x 0.02 mm<sup>3</sup>,  $a$ =17.7530(9),  $b$ =17.8081(7),  $c$ =34.955(2) Å,  $\alpha$ =90.756(4),  $\beta$ =91.063(4),  $\gamma$ =119.895(5) °,  $V$ = 9575.7(8) Å<sup>3</sup>,  $Z$ =2,  $\rho_{\text{calcd}}$ =1.690 Mg m<sup>-3</sup>,  $\mu$ =2.430 mm<sup>-1</sup>,  $2\theta_{\text{max}}$ =54.00°, 65308 measured reflections, 7583 independent reflections ( $R_{\text{int}}$ = 0.1588),  $R1$  [ $I > 2\sigma(I)$ ]=0.0869,  $wR2$  [ $I > 2\sigma(I)$ ]= 0.1433, GOF=0.709, 1142 parameters, final difference map within 2.243 and -2.557 eÅ<sup>-3</sup>. The structure was solved using direct methods and refined by full-matrix least-squares analysis on  $F^2$ . CCDC 826962 contains the supplementary crystallographic data for this paper. These data can be obtained free of charge from The Cambridge Crystallographic Data Center via [www.ccdc.cam.ac.uk/data\\_request/cif](http://www.ccdc.cam.ac.uk/data_request/cif). Selected bond lengths (Å) and angles (deg): Cu1A-N1A 2.046(16), Cu1A-N2A 2.082(14), Cu1A-P1A 2.175(7), Cu1-I1A 2.634(3), N1A-Cu1A-N2A 81.9(6), N1A-Cu1A-P1A 130.7(4), N2A-Cu1A-P1A 118.4(5), N1A-Cu1A-I1A 99.3(4), N2A-Cu1A-I1A 108.2(4), P1A-Cu1A-I1A 113.38(18).

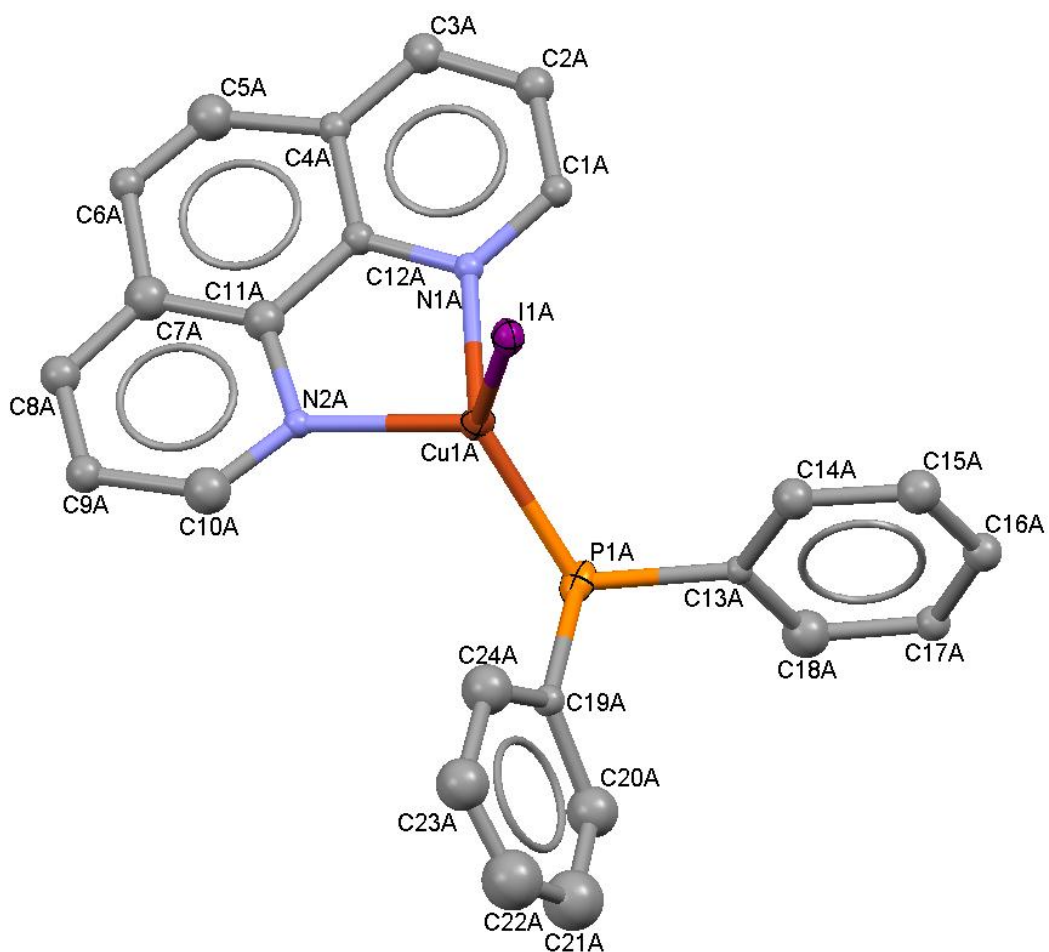

**Complex [Et<sub>2</sub>PHCuIphen] (3b):**

In a Schlenk tube, flushed with nitrogen, CuI (343 mg, 1.8 mmol, 1 equiv.), 1,10-phenanthroline (324 mg, 1.8 mmol, 1 equiv.) and diethylphosphine (3 mL of a 10% in hexane, 2.1 mmol, 1.2 equiv.) were dissolved in degassed dry dichloromethane (25 mL) at -78 °C. The reaction mixture was stirred at room temperature for 2 hours. After evaporation of solvent, the solid residue was washed with diethyl ether (20 mL) and pentane (20 mL), affording an orange solid (0.70 g, 84% yield). Recrystallization at -20 °C from CH<sub>2</sub>Cl<sub>2</sub> /Et<sub>2</sub>O gave orange crystals. Mp = 155 °C (dec.)

<sup>1</sup>H NMR (500 MHz, CD<sub>2</sub>Cl<sub>2</sub>) δ 9.15 (d, <sup>3</sup>J<sub>HH</sub> = 3.9 Hz, 2 H), 8.40 (d, <sup>3</sup>J<sub>HH</sub> = 7.9 Hz, 2 H), 7.89 (s, 2 H), 7.80–7.78 (m, 2 H), 3.92 (dq, <sup>1</sup>J<sub>PH</sub> = 287.4 Hz, <sup>3</sup>J<sub>HH</sub> = 6.4 Hz, 1 H), 1.81–1.72 (m, 4 H), 1.13 (dt, <sup>3</sup>J<sub>HP</sub> = 16.8 Hz, <sup>3</sup>J<sub>HH</sub> = 7.5 Hz, 6 H).

<sup>13</sup>C NMR (125 MHz, CD<sub>2</sub>Cl<sub>2</sub>) δ 149.8, 143.7, 136.7, 129.5, 127.0, 124.9, 14.4 (d, <sup>1</sup>J<sub>CP</sub> = 19.8 Hz), 11.4 (d, <sup>2</sup>J<sub>CP</sub> = 1.8 Hz).

<sup>31</sup>P NMR (202 MHz, CD<sub>2</sub>Cl<sub>2</sub>) δ -40.9 (br).

IR (neat): 3044, 2959, 2318, 1621, 1582, 1508, 1423, 1135, 1054, 841, 727 cm<sup>-1</sup>.

HRMS (ESI) Calcd for C<sub>16</sub>H<sub>19</sub>N<sub>2</sub>PCu [M-I]<sup>+</sup>: 333.0582. Found: 333.0584.

Anal. Calcd for C<sub>16</sub>H<sub>19</sub>CuIN<sub>2</sub>P: C, 41.71; H, 4.16; N, 6.08. Found: C, 41.86; H, 4.30; N, 6.20.

Crystallographic data of **Complex [Et<sub>2</sub>PHCuIphen] (3b)**: Bruker Kappa APEXII CCD diffractometer (MoK<sub>α</sub> λ=0.71073 Å; graphite monochromator; T=150(2) K. Formula C<sub>16</sub>H<sub>19</sub>CuIN<sub>2</sub>P, formula weight 460.74, crystal system monoclinic, space group P2(1)/n, crystal dimensions 0.22 x 0.18 x 0.14 mm<sup>3</sup>, a=7.6247(3), b=15.4479(5), c=14.7132(5) Å, α=90.00, β=91.854(2), γ=90.00°, V= 1732.10(11) Å<sup>3</sup>, Z=4, ρ<sub>calcd</sub>=1.767 Mgm<sup>-3</sup>, μ=3.130 mm<sup>-1</sup>, 2θ<sub>max</sub>=64.52°, 44076 measured reflections, 5254 independent reflections (R<sub>int</sub>= 0.0284), R1 [I>2σ(I)]=0.0226, wR2 [I>2σ(I)]= 0.0519, GOF=1.096, 196 parameters, final difference map within 0.747 and -0.602 eÅ<sup>-3</sup>. The structure was solved using direct methods and refined by full-matrix least-squares analysis on F<sup>2</sup>. CCDC 857695 contains the supplementary crystallographic data for this paper. These data can be obtained free of charge from The Cambridge Crystallographic Data Center via [www.ccdc.cam.ac.uk/data\\_request/cif](http://www.ccdc.cam.ac.uk/data_request/cif). Selected bond lengths (Å) and angles (deg): Cu1-N1 2.0841(14), Cu1-N2 2.0771(15), Cu1-I1 2.6715(3), Cu1-P1 2.1833(5), P1-H1 1.29(3), N2-Cu1-N1 80.56(6), N2-Cu1-P1 131.99(5), N1-Cu1-P1 134.04(4), N2-Cu1-I1 103.21(4), N1-Cu1-I1 102.89(4), P1-Cu1-I1 99.375(14).

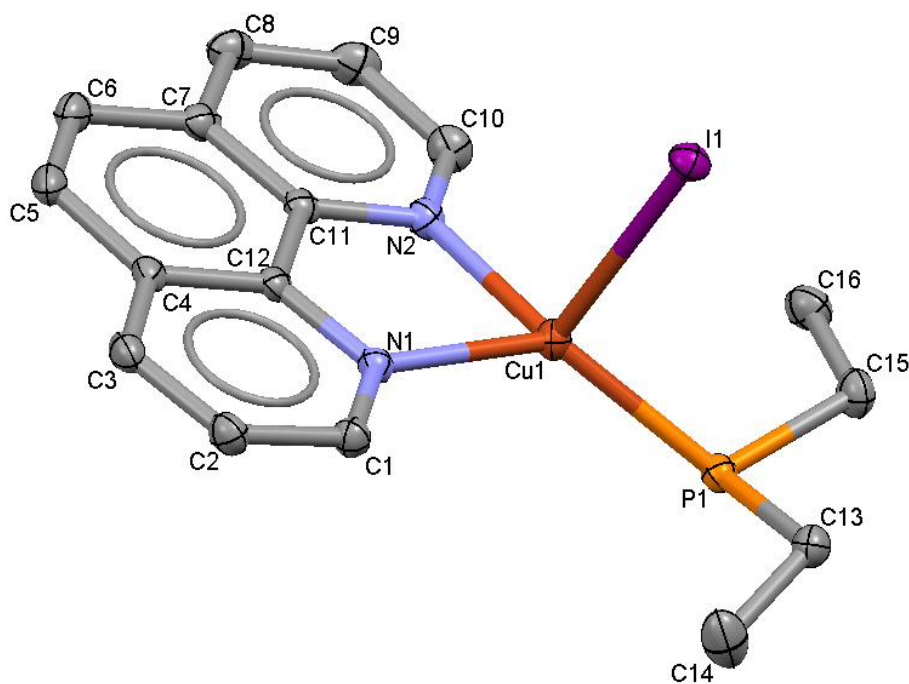

### (III) Synthesis and characterization of complexes [R<sub>2</sub>PHCuPPh<sub>2</sub>BH<sub>3</sub>phen]

#### Complex [Ph<sub>2</sub>PHCuPPh<sub>2</sub>BH<sub>3</sub>phen] (**4a**):

Degassed dry dichloromethane (20 mL) was introduced at  $-78\text{ }^{\circ}\text{C}$  into a Schlenk tube containing [Ph<sub>2</sub>PHCuIphen] (**3a**) (300 mg, 0.54 mmol, 1 equiv.), Me<sub>3</sub>SiOK (76 mg, 0.59 mmol, 1.1 equiv.) and diphenylphosphine-borane (**1**) (108 mg, 0.54 mmol, 1 equiv.). The reaction mixture was stirred for 3 hours. After elimination of KI by filtration, the solvent was removed under vacuum. The resulting red solid was washed with diethyl ether (5 mL) and pentane (5 mL) (279 mg, 82% yield). Single crystals of **4a** were obtained by recrystallization from a mixture of dichloromethane/diethyl ether at  $0\text{ }^{\circ}\text{C}$ . Mp =  $152\text{ }^{\circ}\text{C}$  (dec.)

<sup>1</sup>H NMR (500 MHz, CD<sub>2</sub>Cl<sub>2</sub>) δ 8.85 (br s, 2 H), 8.32 (dd, <sup>3</sup>J<sub>HH</sub> = 8.1 Hz, <sup>4</sup>J<sub>HH</sub> = 0.9 Hz, 2 H), 7.85 (s, 2 H), 7.67–7.65 (m, 2 H), 7.34–7.27 (m, 10 H), 7.21–7.18 (m, 4 H), 6.97–6.92 (m, 6 H), 5.96 (d, <sup>1</sup>J<sub>PH</sub> = 307.4 Hz, 1 H), 1.31–0.78 (m, 3 H).

<sup>13</sup>C NMR (125 MHz, CD<sub>2</sub>Cl<sub>2</sub>) δ 150.1, 143.8, 143.8 (d, <sup>1</sup>J<sub>CP</sub> = 16.1 Hz), 136.3, 133.7 (d, <sup>2</sup>J<sub>CP</sub> = 13.9 Hz), 133.3 (d, <sup>2</sup>J<sub>CP</sub> = 10.5 Hz), 131.7 (d, <sup>1</sup>J<sub>CP</sub> = 25.6 Hz), 129.7, 129.4, 128.9 (d, <sup>3</sup>J<sub>CP</sub> = 8.6 Hz), 127.4 (d, <sup>3</sup>J<sub>CP</sub> = 7.3 Hz), 127.0, 126.4, 124.6.

<sup>31</sup>P NMR (202 MHz, CD<sub>2</sub>Cl<sub>2</sub>) δ  $-20.5$  (br),  $-32.6$  (br d, <sup>1</sup>J<sub>PH</sub> = 307.4 Hz).

<sup>11</sup>B NMR (160 MHz, CD<sub>2</sub>Cl<sub>2</sub>) δ  $-32.3$  to  $-32.9$  (m).

IR (neat): 3064, 2307, 1622, 1581, 1478, 1434, 1423, 1135, 1097, 1055, 838, 820, 736, 724, 693  $\text{cm}^{-1}$ .

MS ( $\text{ES}^+$ )  $m/z$  615  $[\text{M} - \text{BH}_3 + \text{H}]^+$ .

Anal. Calcd for  $\text{C}_{36}\text{H}_{32}\text{BCuN}_2\text{P}_2$ : C, 68.75; H, 5.13; N, 4.45. Found: C, 68.40; H, 5.13; N, 4.56.

Crystallographic data of **complex  $[\text{Ph}_2\text{PHCuPPh}_2\text{BH}_3\text{phen}]$  (4a)**: Bruker Kappa APEXII CCD diffractometer ( $\text{MoK}\alpha$   $\lambda=0.71073$  Å; graphite monochromator;  $T=291(2)$  K. Formula  $\text{C}_{36}\text{H}_{32}\text{BCuN}_2\text{P}_2$ , formula weight 628.93, crystal system triclinic, space group  $P-1$ , crystal dimensions  $0.17 \times 0.13 \times 0.09$   $\text{mm}^3$ ,  $a=9.7656(14)$ ,  $b=11.5098(17)$ ,  $c=16.082(3)$  Å,  $\alpha=98.116(3)$ ,  $\beta=99.785(3)$ ,  $\gamma=112.221(4)$  °,  $V=1606.7(4)$  Å<sup>3</sup>,  $Z=2$ ,  $\rho_{\text{calcd}}=1.300$   $\text{Mgm}^{-3}$ ,  $\mu=0.807$   $\text{mm}^{-1}$ ,  $2\theta_{\text{max}}=58.28^\circ$ , 30590 measured reflections, 6931 independent reflections ( $R_{\text{int}}=0.0179$ ),  $R1 [I>2\sigma(I)]=0.0330$ ,  $wR2 [I>2\sigma(I)]=0.0900$ , GOF=1.023, 384 parameters, final difference map within 0.614 and -0.243  $\text{e}\text{\AA}^{-3}$ . The structure was solved using direct methods and refined by full-matrix least-squares analysis on  $F^2$ . CCDC 857696 contains the supplementary crystallographic data for this paper. These data can be obtained free of charge from The Cambridge Crystallographic Data Center via [www.ccdc.cam.ac.uk/data\\_request/cif](http://www.ccdc.cam.ac.uk/data_request/cif). Selected bond lengths (Å) and angles (deg): Cu1-N1 2.1439(13), Cu1-N2 2.0711(13), Cu1-P1 2.2427(5), Cu1-P2 2.2640(5), P2-B1 1.9480(19), N2-Cu1-N1 79.17(5), N2-Cu1-P1 114.27(4), N1-Cu1-P1 101.08(4), N2-Cu1-P2 118.20(4), N1-Cu1-P2 112.98(4), P1-Cu1-P2 121.105(19).

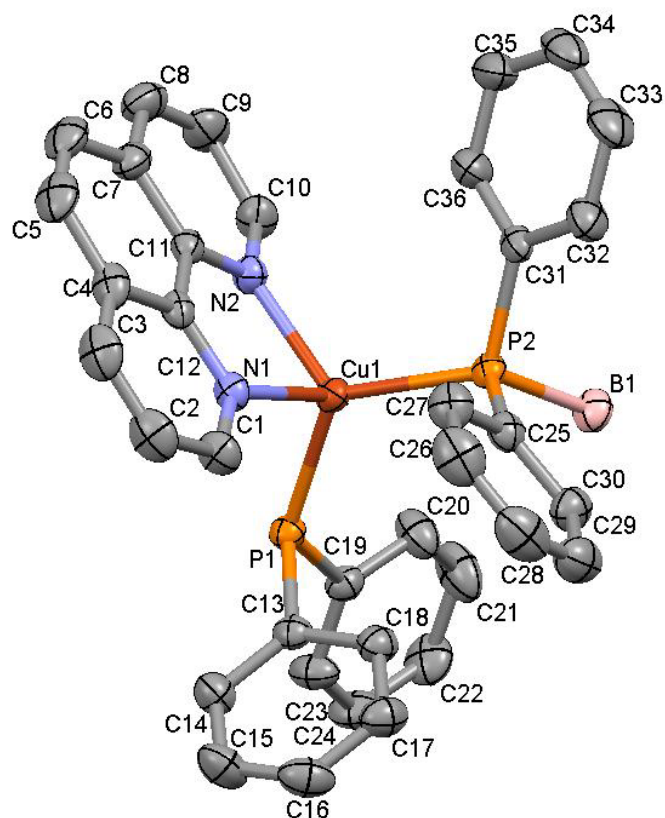

#### Complex [Et<sub>2</sub>PHCuPPh<sub>2</sub>BH<sub>3</sub>phen] (**4b**):

Degassed dry dichloromethane (30 mL) was introduced at  $-78\text{ }^{\circ}\text{C}$  into a Schlenk tube containing [Et<sub>2</sub>PHCuIphen] (**3b**) (400 mg, 0.87 mmol, 1 equiv.), Me<sub>3</sub>SiOK (123 mg, 0.96 mmol, 1.1 equiv.) and diphenylphosphine-borane (174 mg, 0.87 mmol, 1 equiv.). The reaction mixture was stirred for 3 hours. After elimination of KI by filtration, the solvent was removed under vacuum. The resulting red solid was washed with diethyl ether (10 mL) and pentane (10 mL) (414 mg, 89% yield). Single crystals of **4b** were obtained by recrystallization from a mixture of dichloromethane/pentane at  $0\text{ }^{\circ}\text{C}$ . Mp =  $122\text{ }^{\circ}\text{C}$  (dec.)

<sup>1</sup>H NMR (500 MHz, CD<sub>2</sub>Cl<sub>2</sub>) δ 9.10 (d, <sup>3</sup>J<sub>HH</sub> = 3.8 Hz, 2 H), 8.32 (d, <sup>3</sup>J<sub>HH</sub> = 7.8 Hz, 2 H), 7.83 (s, 2 H), 7.75–7.72 (m, 2 H), 7.32–7.28 (m, 4 H), 6.97–6.96 (m, 6 H), 3.90 (dq, <sup>1</sup>J<sub>HP</sub> = 283.1 Hz, <sup>3</sup>J<sub>HH</sub> = 6.2 Hz, 1 H), 1.67–1.56 (m, 4 H), 1.00 (dt, <sup>3</sup>J<sub>HP</sub> = 16.1 Hz, <sup>3</sup>J<sub>HH</sub> = 7.5 Hz, 6 H), 1.28–0.76 (m, 3H).

<sup>13</sup>C NMR (125 MHz, CD<sub>2</sub>Cl<sub>2</sub>) δ 149.8, 144.4 (d, <sup>1</sup>J<sub>CP</sub> = 15.1 Hz), 143.8, 136.1, 133.2 (d, <sup>2</sup>J<sub>CP</sub> = 10.5 Hz), 129.4, 127.3 (d, <sup>3</sup>J<sub>CP</sub> = 7.2 Hz), 127.0, 126.1, 124.5, 14.1 (d, <sup>1</sup>J<sub>CP</sub> = 17.0 Hz), 11.4.

<sup>31</sup>P NMR (202 MHz, CD<sub>2</sub>Cl<sub>2</sub>) δ  $-21.3$  (br),  $-42.8$  (br).

<sup>11</sup>B NMR (160 MHz, CD<sub>2</sub>Cl<sub>2</sub>) δ  $-32.4$  to  $-33.0$  (m).

IR (neat): 3047, 2962, 2318, 1621, 1582, 1475, 1423, 1135, 1095, 1054, 840, 727, 698 cm<sup>-1</sup>.

HRMS (ESI) Calcd for C<sub>16</sub>H<sub>19</sub>N<sub>2</sub>PCu [M–Ph<sub>2</sub>PBH<sub>3</sub>]<sup>+</sup>: 333.0582. Found: 333.0585.



Anal. Calcd for  $C_{28}H_{32}BCuN_2P_2$ : C, 63.11; H, 6.05; N, 5.26. Found: C, 62.75; H, 6.12; N, 5.35.

Crystallographic data of **complex [Et<sub>2</sub>PHCuPPh<sub>2</sub>BH<sub>3</sub>phen] (4b)**: Bruker Kappa APEXII CCD diffractometer ( $MoK\alpha$   $\lambda=0.71073$  Å; graphite monochromator;  $T=150(2)$  K. Formula  $C_{28}H_{32}BCuN_2P_2$ , formula weight 532.85, crystal system monoclinic, space group  $C2/c$ , crystal dimensions  $0.32 \times 0.28 \times 0.21$  mm<sup>3</sup>,  $a=27.1263(5)$ ,  $b=13.9139(3)$ ,  $c=16.8585(3)$  Å,  $\alpha=90.00$ ,  $\beta=114.852(1)$ ,  $\gamma=90.00$  °,  $V= 5773.71(19)$  Å<sup>3</sup>,  $Z=8$ ,  $\rho_{calcd}=1.226$  Mgm<sup>-3</sup>,  $\mu=0.885$  mm<sup>-1</sup>,  $2\theta_{max}=56.58^\circ$ , 44477 measured reflections, 5932 independent reflections ( $R_{int}= 0.0259$ ),  $R1 [I>2\sigma(I)]=0.0507$ ,  $wR2 [I>2\sigma(I)]= 0.1553$ , GOF=1.131, 314 parameters, final difference map within 1.353 and -0.626 eÅ<sup>-3</sup>. The structure was solved using direct methods and refined by full-matrix least-squares analysis on  $F^2$ . CCDC 857697 contains the supplementary crystallographic data for this paper. These data can be obtained free of charge from The Cambridge Crystallographic Data Center via [www.ccdc.cam.ac.uk/data\\_request/cif](http://www.ccdc.cam.ac.uk/data_request/cif). Selected bond lengths (Å) and angles (deg): Cu1-N1 2.098(2), Cu1-N2 2.095(2), Cu1-P1 2.2505(8), Cu1-P2 2.2609(6), P2-B1 1.941(3), N2-Cu1-N1 79.86(9), N2-Cu1-P1 111.07(7), N1-Cu1-P1 107.02(6), N2-Cu1-P2 109.05(6), N1-Cu1-P2 127.73(6), P1-Cu1-P2 115.93(3).

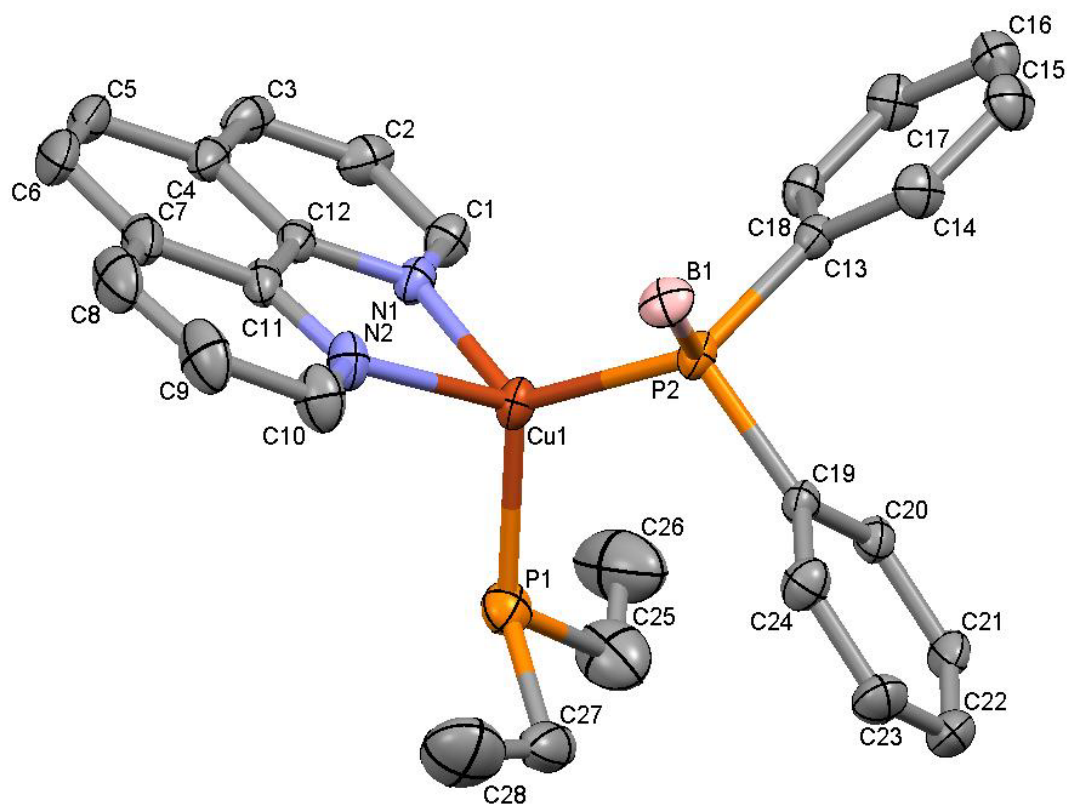

#### (IV) Synthesis of alkynylphosphine **6** using a catalytic amount of complex **4a** or **4b**

In a Schlenk tube, flushed with nitrogen, were introduced complex **4a** (16 mg, 0.025 mmol, 10 mol%) or **4b** (13 mg, 0.025 mmol, 10 mol%), phosphine-borane **1** (50 mg, 0.25 mmol, 1 equiv.), and K<sub>2</sub>CO<sub>3</sub> (69 mg, 0.5 mmol, 2 equiv.). After cooling to -60 °C, degassed dry toluene (3 mL) and a solution of 1-bromohexyne (**5**) (48 mg, 0.30 mmol, 1.2 equiv.) in degassed dry toluene (1 mL) were successively added. After stirring for 30 min, the cool bath was removed and the reaction mixture was stirred at rt overnight. Next the reaction mixture was filtered over celite with toluene as the eluent. The filtrate was concentrated under reduced pressure and the residue was purified by silica gel column chromatography with pentane/toluene (6:4) as the eluent. The alkynylphosphine **6** was obtained in 80% (56 mg) and 81% (57 mg) yields using complexes **4a** and **4b** respectively.

### (V) NMR spectra

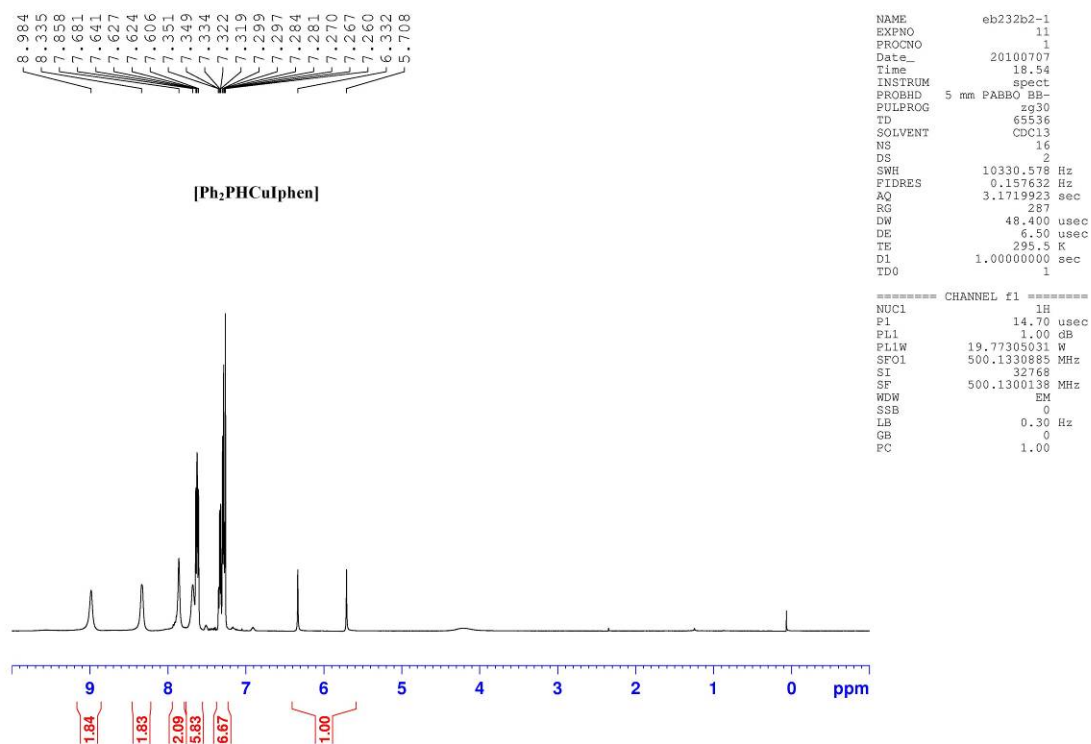

<sup>1</sup>H NMR (500 MHz, CDCl<sub>3</sub>) spectrum of complex [Ph<sub>2</sub>PHCuIphen] (**3a**)

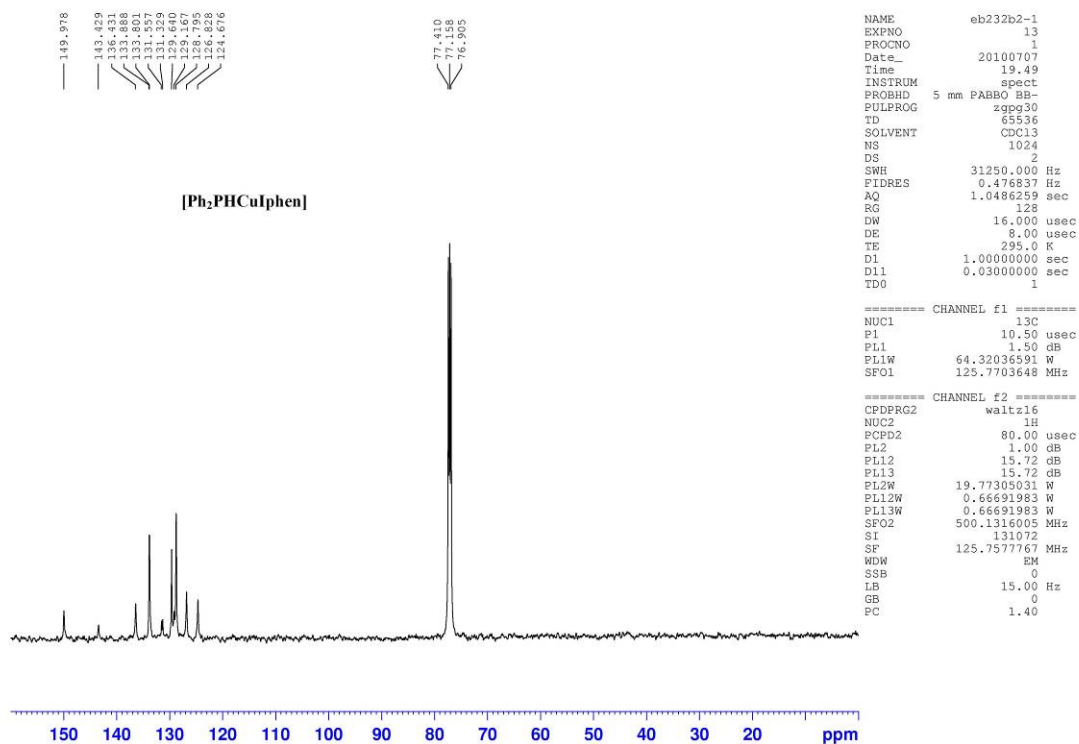

<sup>13</sup>C NMR (125 MHz, CDCl<sub>3</sub>) spectrum of complex [Ph<sub>2</sub>PHCuIphen] (**3a**)

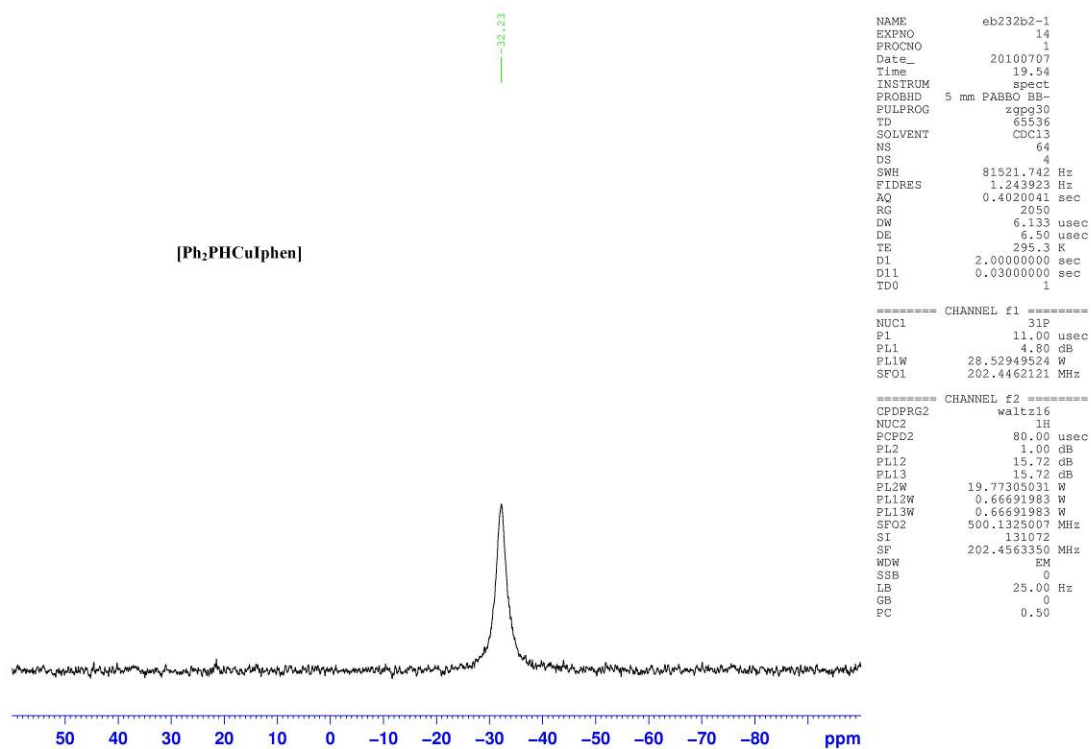

<sup>31</sup>P NMR (202 MHz, CDCl<sub>3</sub>) spectrum of complex [Ph<sub>2</sub>PHCuIphen] (**3a**)

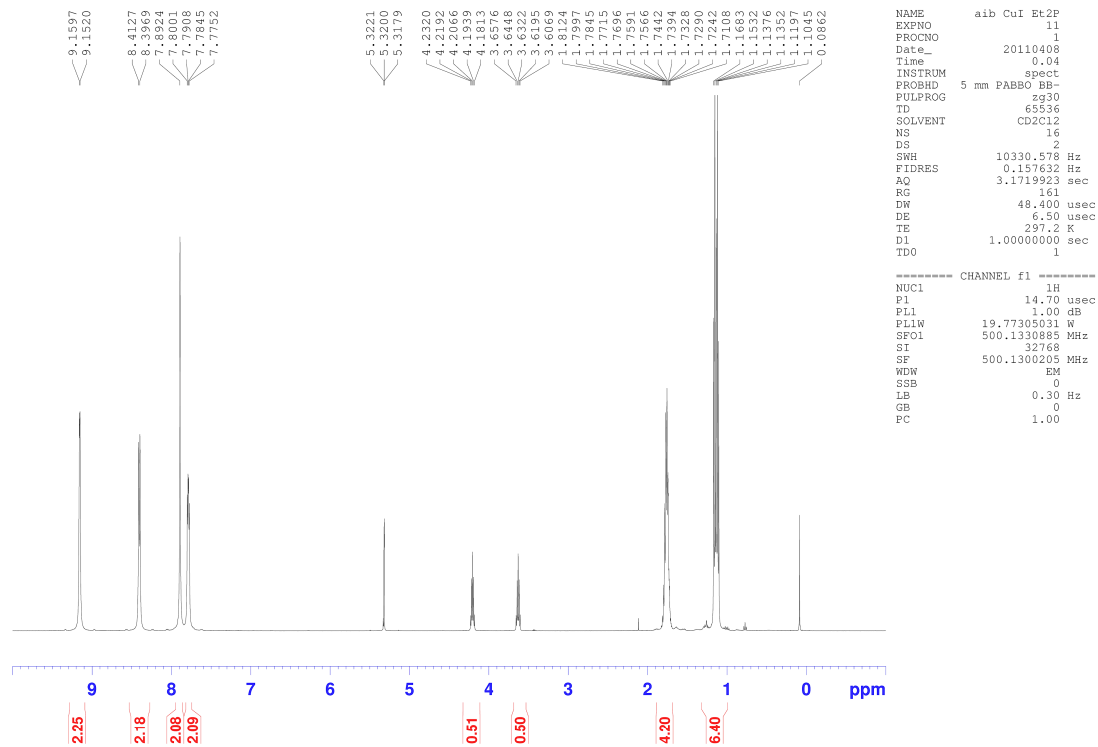

<sup>1</sup>H NMR (500 MHz, CD<sub>2</sub>Cl<sub>2</sub>) spectrum of complex [Et<sub>2</sub>PHCuIphen] (**3b**)

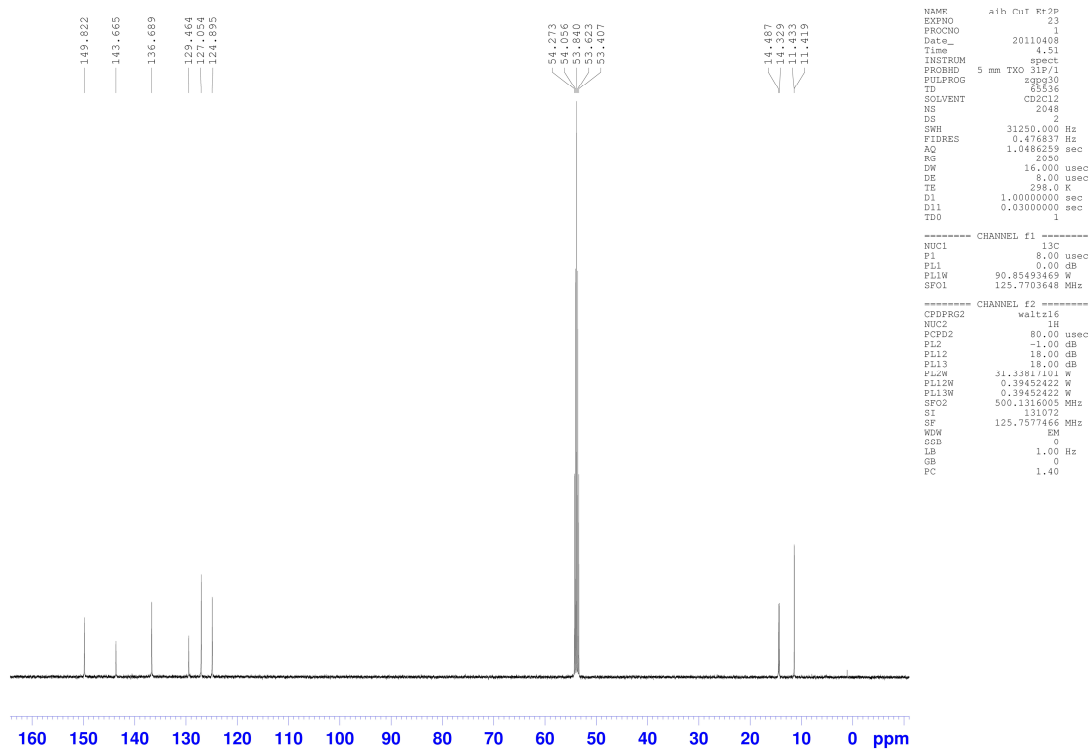

<sup>13</sup>C NMR (125 MHz, CD<sub>2</sub>Cl<sub>2</sub>) spectrum of complex [Et<sub>2</sub>PHCuIphen] (**3b**)

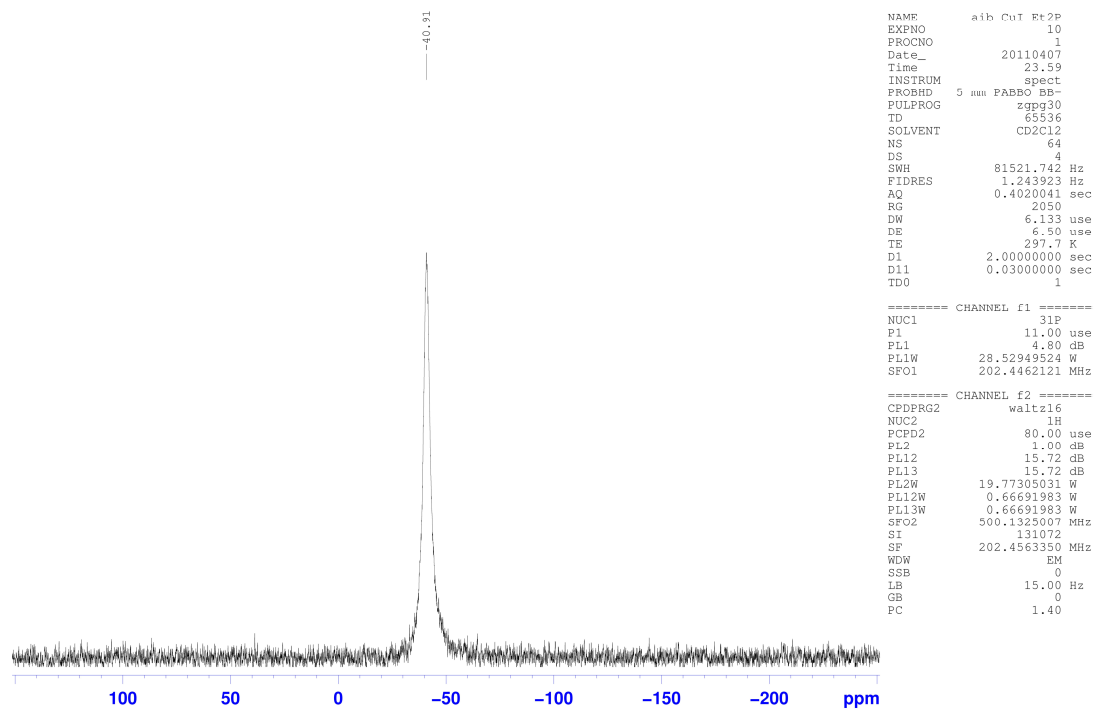

<sup>31</sup>P NMR (202 MHz, CD<sub>2</sub>Cl<sub>2</sub>) spectrum of complex [Et<sub>2</sub>PHCuIphen] (**3b**)

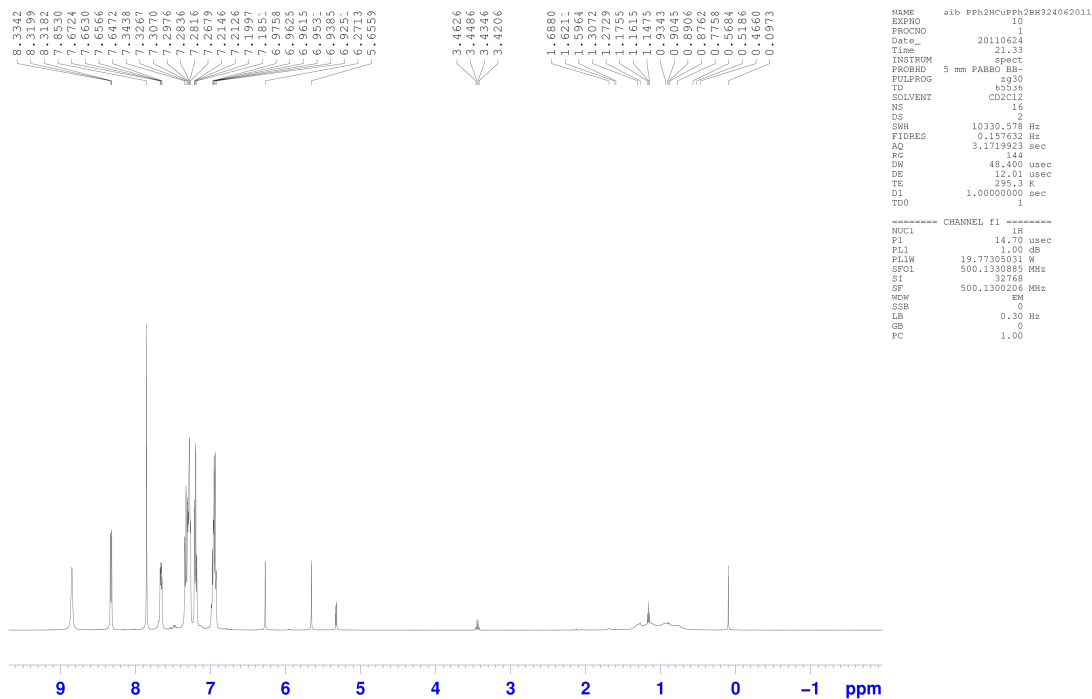

$^1\text{H}$  NMR (500 MHz,  $\text{CD}_2\text{Cl}_2$ ) spectrum of complex  $[\text{Ph}_2\text{PHCuPPh}_2\text{BH}_3\text{phen}]$  (**4a**)

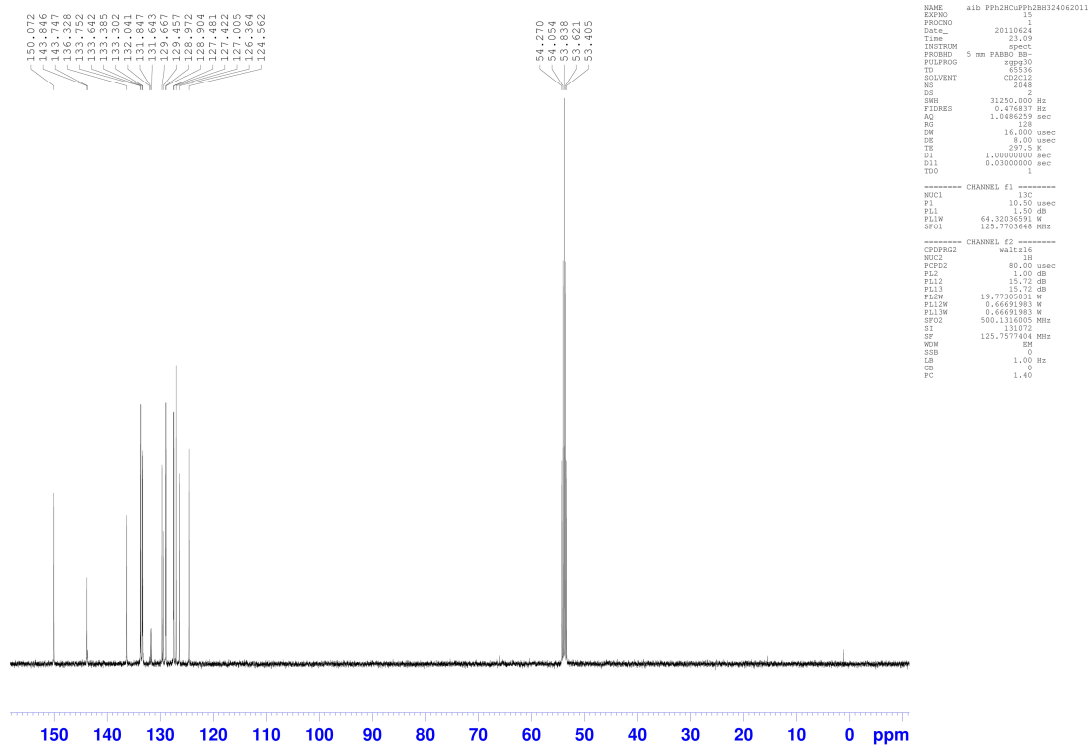

$^{13}\text{C}$  NMR (125 MHz,  $\text{CD}_2\text{Cl}_2$ ) spectrum of complex  $[\text{Ph}_2\text{PHCuPPh}_2\text{BH}_3\text{phen}]$  (**4a**)

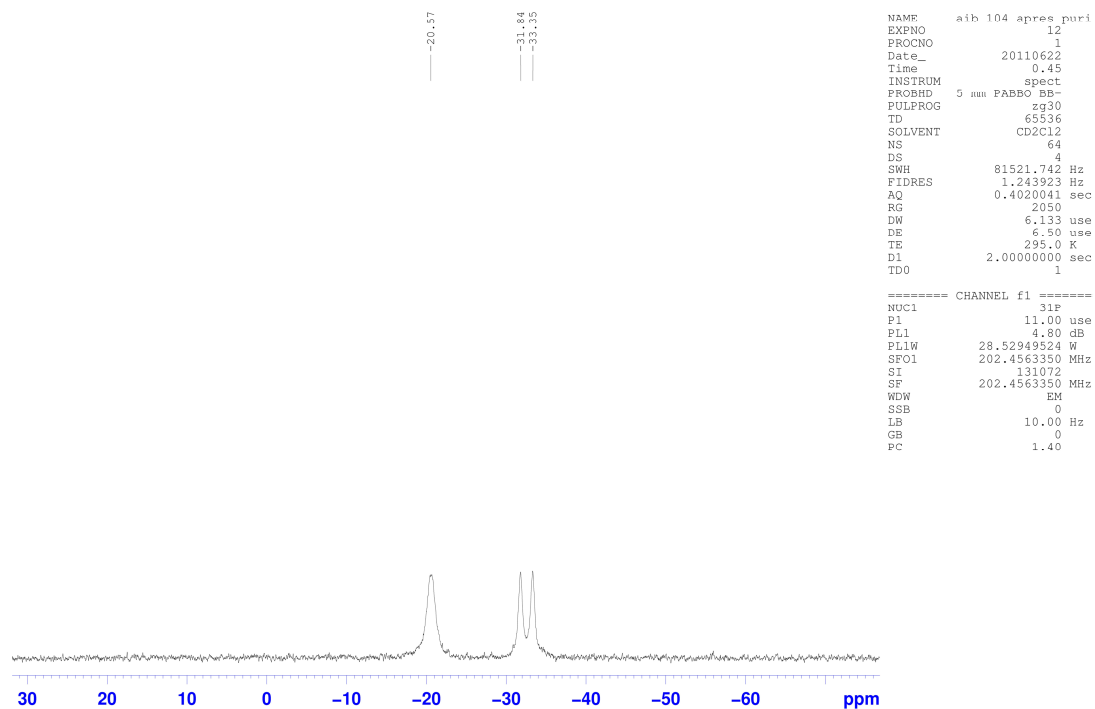

<sup>31</sup>P NMR (202 MHz, CD<sub>2</sub>Cl<sub>2</sub>) spectrum of complex [Ph<sub>2</sub>PHCuPPh<sub>2</sub>BH<sub>3</sub>phen] (**4a**)

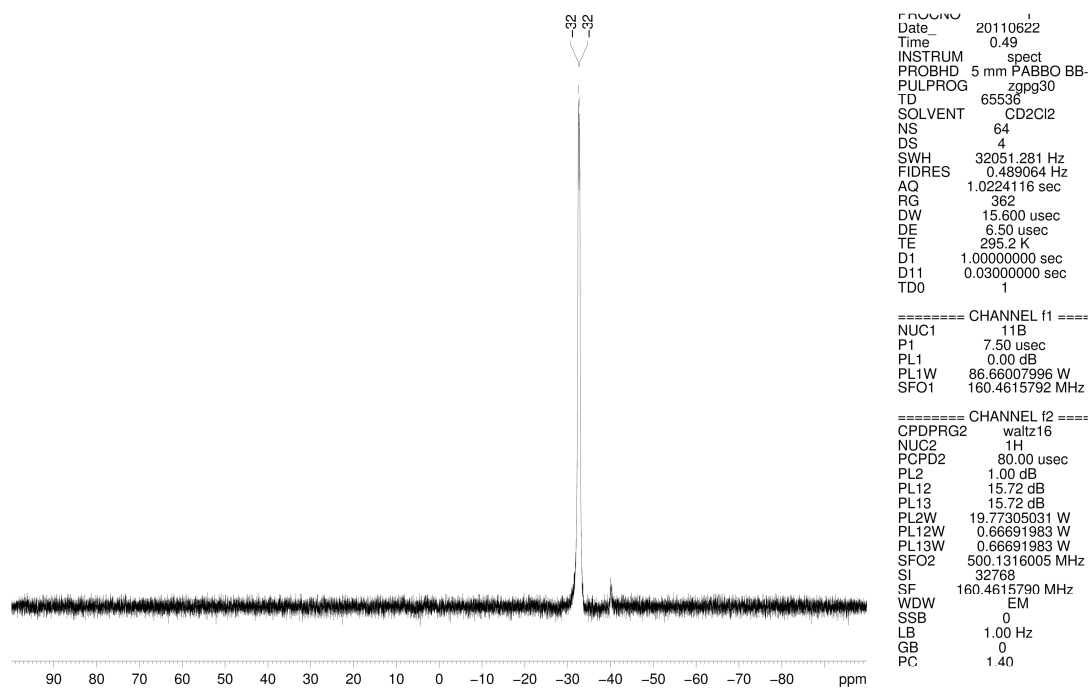

<sup>11</sup>B NMR (160 MHz, CD<sub>2</sub>Cl<sub>2</sub>) spectrum of complex [Ph<sub>2</sub>PHCuPPh<sub>2</sub>BH<sub>3</sub>phen] (**4a**)

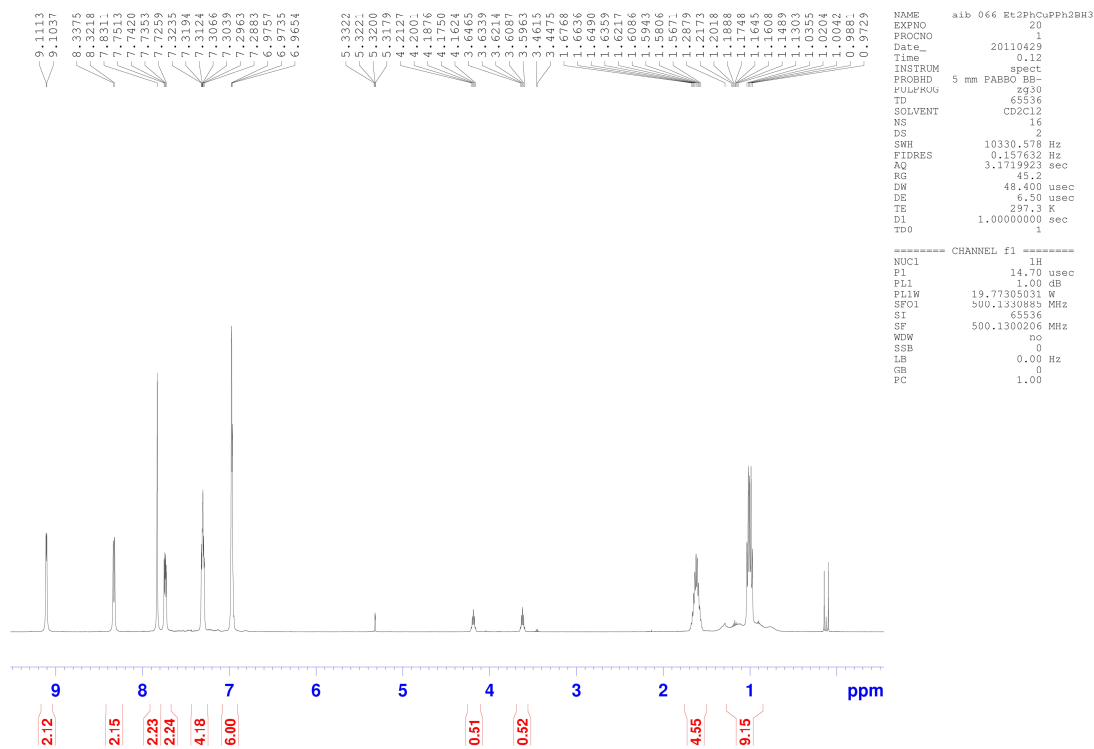

<sup>1</sup>H NMR (500 MHz, CD<sub>2</sub>Cl<sub>2</sub>) spectrum of complex [Et<sub>2</sub>PHCuPPh<sub>2</sub>BH<sub>3</sub>phen] (**4b**)

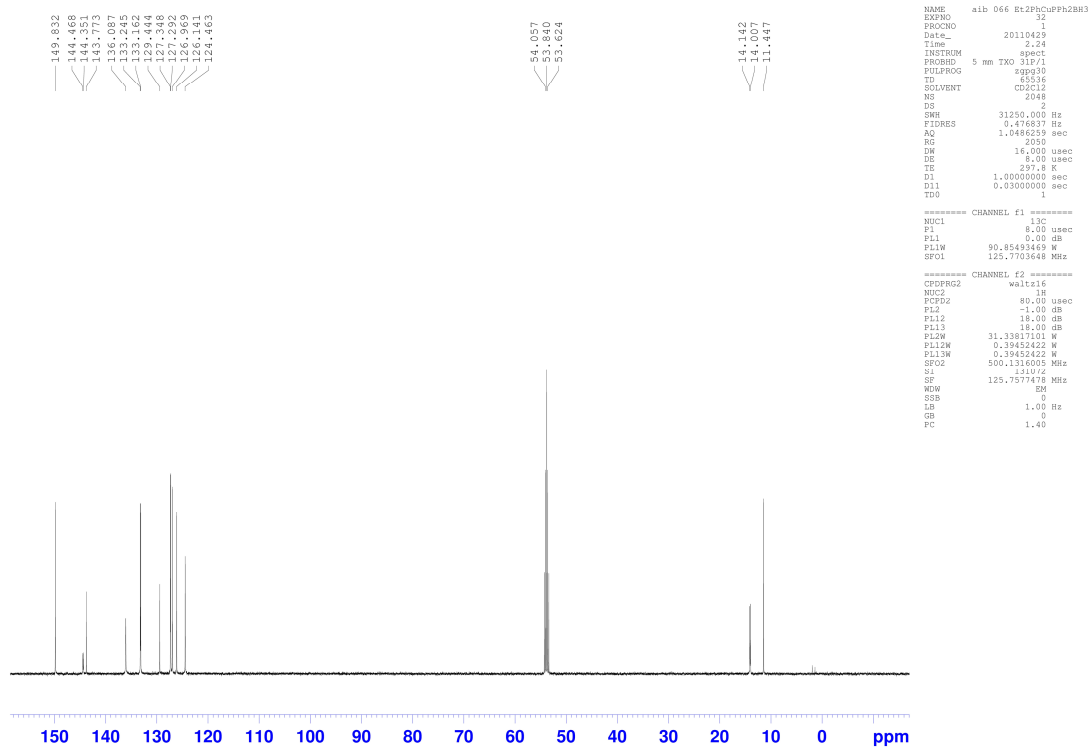

<sup>13</sup>C NMR (125 MHz, CD<sub>2</sub>Cl<sub>2</sub>) spectrum of complex [Et<sub>2</sub>PHCuPPh<sub>2</sub>BH<sub>3</sub>phen] (**4b**)



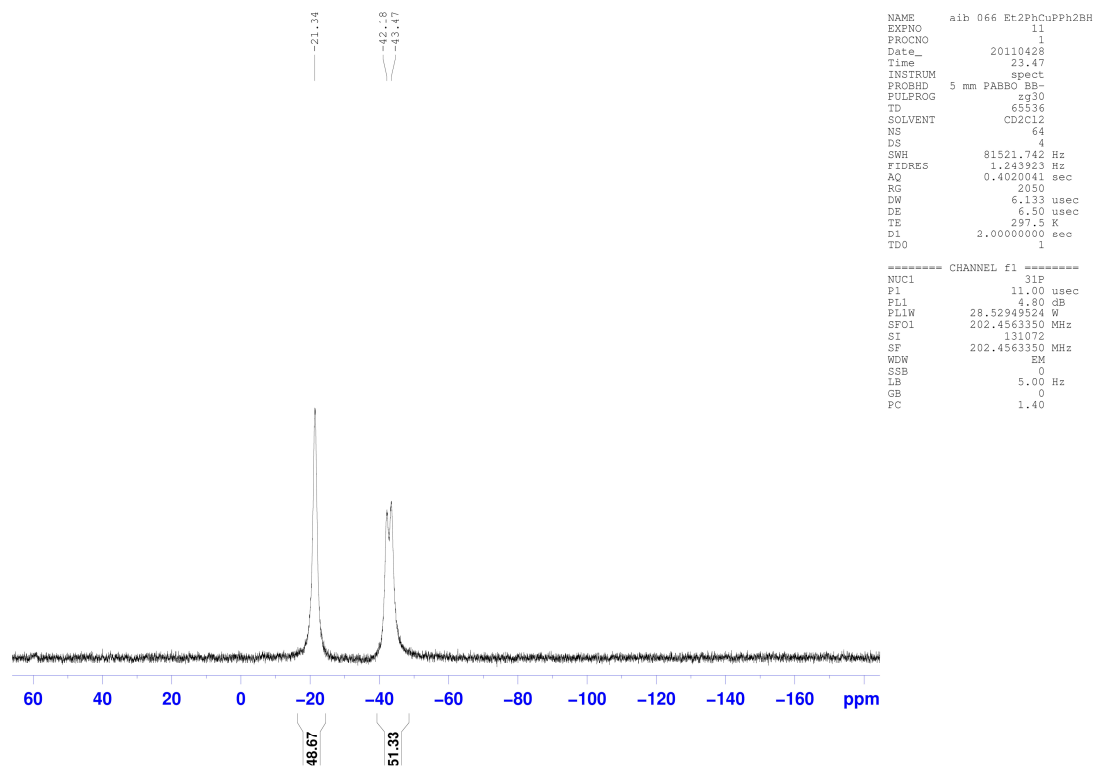

$^{31}\text{P}$  NMR (202 MHz,  $\text{CD}_2\text{Cl}_2$ ) spectrum of complex  $[\text{Et}_2\text{PHCuPPh}_2\text{BH}_3\text{phen}]$  (**4b**)

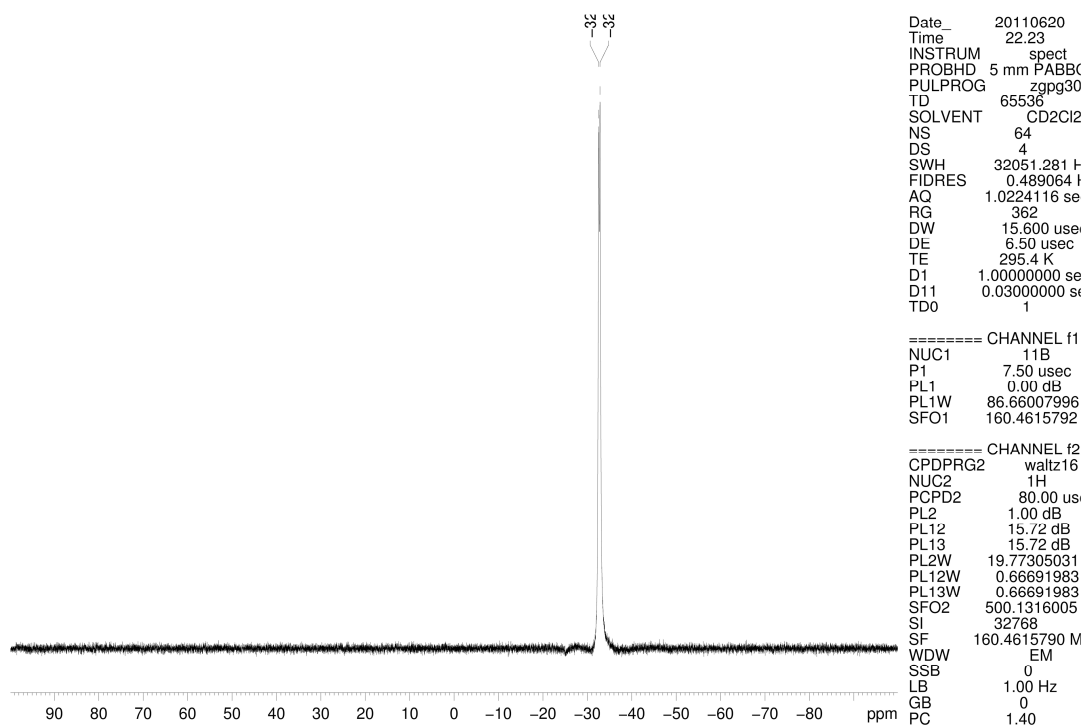

$^{11}\text{B}$  NMR (160 MHz,  $\text{CD}_2\text{Cl}_2$ ) spectrum of complex  $[\text{Et}_2\text{PHCuPPh}_2\text{BH}_3\text{phen}]$  (**4b**)

## (VI) Theoretical studies

The nature of the copper phosphido-borane bond in complexes **4** was investigated using electron localization function (ELF)<sup>i</sup> and atoms in molecules (AIM) theoretical studies.<sup>ii</sup> ELF topological analysis is a unique tool for chemical bonding studies, as it provides a partition of the molecular space into basins that are in one-to-one correspondence with classical Lewis-type electronic units such as cores, bonds and lone pairs.<sup>1b</sup> The populations and (co)variances of these valence basins can be further interpreted in terms of weighted combinations of mesomeric structures.<sup>iii</sup>

ELF and AIM analyses of copper complexes **4a** and **4b** were performed at the B3PW91/DGDZVP level using the experimental geometries. AIM atomic charges and average populations of selected ELF valence basins are given in Figure S1.

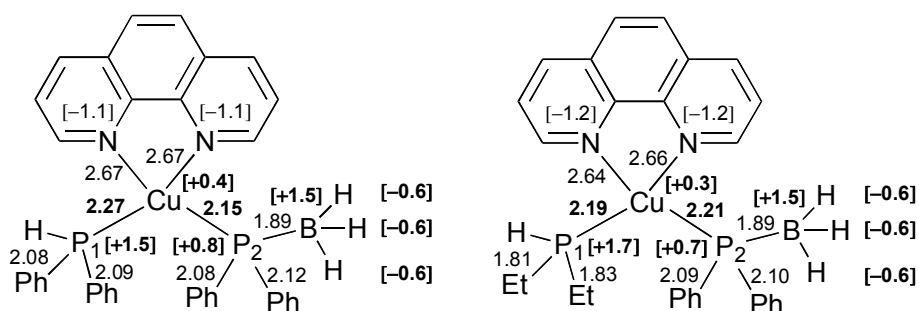

**Figure S1.** Average populations of selected ELF valence basins of complex **4a** (left) and **4b** (right). Atomic AIM charges in brackets. Calculation performed at the B3PW91/DGDZVP level, on the experimental geometry.

The ELF picture of various phosphorus ligands is summarized in Table S1.

| Ligand                   | PPh <sub>3</sub> | HPPPh <sub>2</sub> | H <sub>3</sub> BPPPh <sub>2</sub> | (PPh <sub>2</sub> ) <sup>-</sup> |
|--------------------------|------------------|--------------------|-----------------------------------|----------------------------------|
| V(P)                     | 2.13             | 2.14               | 2.12                              | 2 x 1.94                         |
| V(P, C <sub>ipso</sub> ) | 2.11             | 2.04               | 2.12                              | 2.15                             |
|                          | 2.11             | 2.08               | 2.08                              |                                  |
|                          | 2.12             |                    |                                   |                                  |
| Q <sub>AIM</sub> (P)     | + 1.5            | + 1.5              | + 0.6                             | + 0.6                            |
| f <sub>ELF</sub> (V(P))  | 0.35             | 0.32               | 0.40                              | 2 x 0.27                         |
| f <sub>AIM</sub> (P)     | 0.40             | 0.37               | 0.55                              | 0.57                             |

**Table S1.** Atomic AIM charge of P (Q<sub>AIM</sub> (P)) and average population of selected ELF valence basins in various phosphines and phosphide ligands. B3PW91/6-31G\*\*//PCM-B3PW91/6-31G\*\* level of calculation.

The results of the frontier molecular orbital analysis of various phosphorus ligands are given on Figure S2.

Energy (au)

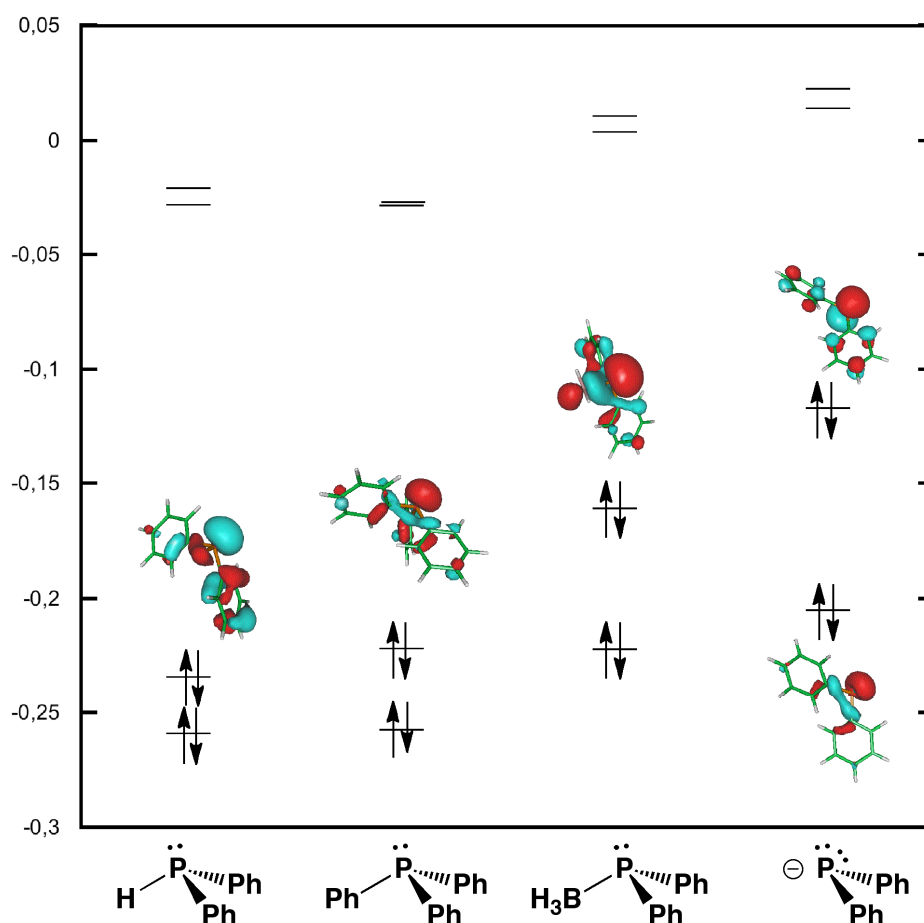

**Figure S2.** Comparison of near-frontier molecular orbitals of various phosphorus ligands. PCM-B3PW91/6-31G\*\* calculation in dichloromethane.

The molecular orbitals corresponding to the  $\sigma$  bonds in complex **4a** are given in Figure S3.

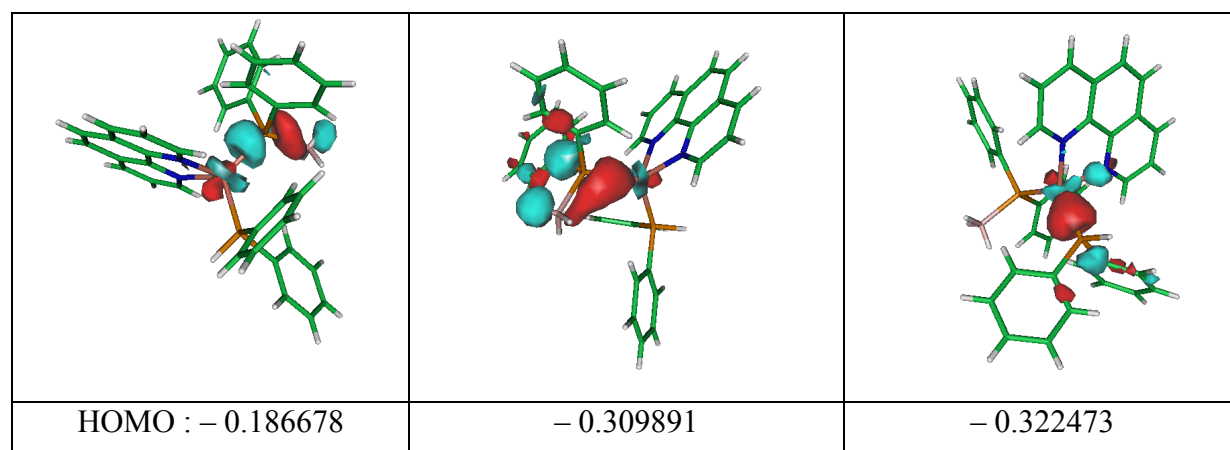

**Figure S3.** Molecular orbitals of complex **4a** related to the Cu-P  $\sigma$ -bonds. PCM-B3PW91/6-31G\*\* calculation in dichloromethane.

Bond dissociation energies of phosphine and phosphido-borane ligands in complex **4a** are compared in Table S2

| Dissociated ligand                    | HPPh <sub>2</sub> | H <sub>3</sub> B-PPh <sub>2</sub> |
|---------------------------------------|-------------------|-----------------------------------|
| $\Delta E_{\text{diss}}^{\text{a}}$   | 14.48             | 31.88                             |
| $\Delta E_{\text{diss}} + \text{ZPE}$ | 13.13             | 30.57                             |
| $\Delta G_{\text{diss}}^{\text{a}}$   | -1.52             | 16.21                             |

**Table S2.** Heterolytic dissociation energies (in kcal/mol) calculated at the PCM-B3PW91/6-31G\*\* level in dichloromethane using relaxed fragments as references. <sup>a</sup> $\Delta E$  refers to the dissociation energy calculated at 0 K whereas  $\Delta G$  refers to the Gibbs dissociation energy calculated at 298.15K.

The above theoretical studies suggest that the phosphido-borane ligand is of L type in the Green formalism.<sup>iv</sup> The 18e copper complex **4a** may be described by the mesomeric form of Figure S4.

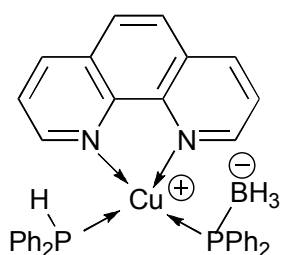

**Figure S4.** Mesomeric form describing the chemical bonding in copper complex **4a**.

The relative chemical reactivity of the Cu-P<sub>1</sub> and Cu-P<sub>2</sub> bonds was further investigated using Fukui indices. The Fukui function was introduced by Parr and Yang as the response of the electron density of the molecular system to a change in the global number of electrons.<sup>v</sup> It can be expressed as the derivative of the electron density  $\rho(\mathbf{r})$  with respect to the number of electrons  $N$ , calculated at a constant external potential  $v(\mathbf{r})$ . Because of the discontinuity in this derivative, left and right derivatives have to be considered. The local Fukui functions  $f^+(\mathbf{r}) = (\partial\rho/\partial N)^+_{v}$  and  $f^-(\mathbf{r}) = (\partial\rho/\partial N)^-_{v}$  are therefore the response for adding or removing electron from the system and allow for investigation of nucleophilic and electrophilic attack respectively.

The finite difference approach ( $\Delta N = \pm 1$ ) allows for estimation of approximate local Fukui functions  $f(\mathbf{r})$  from the electron density  $\rho(\mathbf{r})$  or of atomic Fukui indices  $f(A)$  from atomic charges  $Q(A)$ .<sup>vi</sup>

$$f^+(r) = \rho_{N+1}(r) - \rho_N(r) ; f^-(r) = \rho_N(r) - \rho_{N-1}(r)$$

$$f^+(A) = Q_N(A) - Q_{N+1}(A) ; f^-(A) = Q_{N-1}(A) - Q_N(A)$$

Recently, alternative schemes relying on the condensation of frontier molecular orbital (FMO) Fukui functions within an AIM<sup>vii</sup> or ELF<sup>viii</sup> topological partition have been disclosed:

$$f_X^\alpha(r) = \int_X |\phi_{KS}^F(r)|^2 dr$$

is the contribution of the FMO  $F$  ( $\alpha = -$  :  $F = \text{HOMO}$  ;  $\alpha = +$  :  $F = \text{LUMO}$ ) to the atomic AIM basin or to the core or valence ELF basin  $X$ . The latter indices are more attractive than the above atomic indices because they are confined in the 0 to 1 range and they sum up to one:  $0 \leq f_X^\alpha \leq 1$  et  $\sum_X f_X^\alpha = 1$ . The larger the value of the  $f$  index, the more reactive the corresponding basin  $X$ .

The dual reactivity descriptor  $\Delta f = f^+(r) - f^-(r)$  may also be used for the simultaneous detection of the nucleophilic or electrophilic behavior of a given site and is especially useful for ambiphilic reagents.<sup>ix</sup>

The sensitivity of copper complex **4a** towards the electrophilic attack such as the one of an alkynyl halide was investigated using Fukui functions  $f^-$  condensed on ELF or AIM basins. Their values calculated at the B3PW91/DGDZVP level using the experimental geometry of **4a** are given on Figure S5.

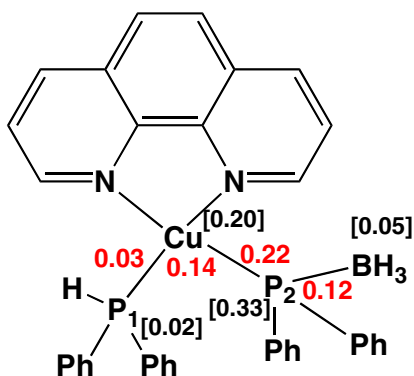

**Figure S5.** Selected Fukui functions  $f^-$  condensed on ELF (in red) or AIM (in brackets) basins of copper complex **4a**. B3PW91/DGDZVP calculation performed on the experimental geometry.

The  $^{31}\text{P}$  and  $^{11}\text{B}$  NMR spectra of complex **4a** were calculated at the GIAO/B3PW91/6-31+G\*\* level. The calculated chemical shifts and spin coupling constants are in good agreement with the experimental data (Table S3).

|       | $\delta_{\text{P}}$ (ppm) | $\delta_{\text{B}}$ (ppm) | $^2J_{\text{PP}}$ (Hz) | $^1J_{\text{PB}}$ (Hz)  |
|-------|---------------------------|---------------------------|------------------------|-------------------------|
| Exp.  | -32.56 (P <sub>1</sub> )  | -32.40                    |                        |                         |
|       | -20.53 (P <sub>2</sub> )  |                           |                        |                         |
| Calcd | -33.57 (P <sub>1</sub> )  | -37.96                    | 74.70                  | -0.15 (P <sub>1</sub> ) |
|       | -22.74 (P <sub>2</sub> )  |                           |                        | 55.17 (P <sub>2</sub> ) |

**Table S3.** Comparison of experimental and calculated  $^{31}\text{P}$  and  $^{11}\text{B}$  NMR spectra of complex **4a**. B3PW91/6-31+G\*\*//B3PW91/6-31G\*\*/LANL2DZ(Cu) level of calculation.

### Computational details

Geometries were fully optimized at the PCM-B3PW91/6-31G\*\*/LANL2DZ\*(Cu) level of calculation using Gaussian09.<sup>x</sup> LANL2DZ\*(Cu) means that f-polarization functions derived by Ehlers et al.<sup>xi</sup> for Cu have been added to the LANL2DZ(Cu) basis set. Vibrational analysis was performed at the same level as the geometry optimization. Solvent effects were included using the polarizable continuum model (PCM) implemented in Gaussian09 (dichloromethane solvent,  $\epsilon=8.93$ ).

The magnetic shielding tensor and nuclear spin coupling constants were calculated at the B3PW91/6-31+G\*\* level using the GIAO (gauge-independent atomic orbital) method implemented in Gaussian09.<sup>10</sup> The  $^{31}\text{P}$  NMR chemical shifts were estimated with respect to the usual  $\text{H}_3\text{PO}_4$  reference and the  $^{11}\text{B}$  NMR chemical shifts were estimated with respect to the usual  $\text{BF}_3\cdot\text{OEt}_2$  reference.

Atoms in molecules (AIM) and electron localization function (ELF) analyses were performed with the TopMoD package.<sup>xii</sup>

Molecular orbitals were plotted using the GABEDIT program.<sup>xiii</sup>

<sup>i</sup> (a) A. D. Becke and K. E. Edgecombe, *J. Chem. Phys.*, 1990, **92**, 5379; (b) B. Silvi and A. Savin, *Nature*, 1994, **371**, 683.

<sup>ii</sup> R. F. W. Bader in *Atoms In Molecules*; Clarendon Press: Oxford, UK, 1990.

- 
- iii** (a) C. Lepetit, B. Silvi and R. Chauvin, *J. Phys. Chem. A*, 2003, **107**, 464; (b) B. Silvi, *Phys. Chem. Chem. Phys.*, 2004, **6**, 256.
- iv** (a) M. L. H. Green, *J. Organomet. Chem.*, 1995, **500**, 127; (b) Y. Canac, C. Lepetit and R. Chauvin, *Top. Organomet. Chem.*, 2010, **30**, 1.
- v** R. G. Parr and W. Yang, *J. Am. Chem. Soc.*, 1984, **106**, 4049.
- vi** H. Chermette, P. Boulet and S. Portmann, *Rev. Modern Quant. Chem.*, 2002, **2**, 992.
- vii** F. A. Bulat, E. Chamorro, P. Fuentealba and A. Toro-Labbé, *J. Phys. Chem.*, 2004, **108**, 342.
- viii** W. Tiznado, E. Chamorro, R. Contreras and P. Fuentealba *J. Phys. Chem.*, 2005, **109**, 3220.
- ix** (a) C. Morell, A. Grand and A. Toro-Labbe, *J. Phys. Chem. A*, 2005, **109**, 205; (b) C. Morell, A. Grand, S. Gutierrez-Oliva and A. Toro-Labbe, *Theor. Comp. Chem.*, 2007, **19**, 101; (c) C. Cardenas, N. Rabi, P. W. Ayers, C. Morell, P. Jaramillo and P. Fuentealba, *J. Phys. Chem. A*, 2009, **113**, 8660.
- x** Gaussian 09, Revision A.1, M. J. Frisch, G. W. Trucks, H. B. Schlegel, G. E. Scuseria, M. A. Robb, J. R. Cheeseman, G. Scalmani, V. Barone, B. Mennucci, G. A. Petersson, H. Nakatsuji, M. Caricato, X. Li, H. P. Hratchian, A. F. Izmaylov, J. Bloino, G. Zheng, J. L. Sonnenberg, M. Hada, M. Ehara, K. Toyota, R. Fukuda, J. Hasegawa, M. Ishida, T. Nakajima, Y. Honda, O. Kitao, H. Nakai, T. Vreven, Jr., J. A. Montgomery, J. E. Peralta, F. Ogliaro, M. Bearpark, J. J. Heyd, E. Brothers, K. N. Kudin, V. N. Staroverov, R. Kobayashi, J. Normand, K. Raghavachari, A. Rendell, J. C. Burant, S. S. Iyengar, J. Tomasi, M. Cossi, N. Rega, N. J. Millam, M. Klene, J. E. Knox, J. B. Cross, V. Bakken, C. Adamo, J. Jaramillo, R. Gomperts, R. E. Stratmann, O. Yazyev, A. J. Austin, R. Cammi, C. Pomelli, J. W. Ochterski, R. L. Martin, K. Morokuma, V. G. Zakrzewski, G. A. Voth, P. Salvador, J. J. Dannenberg, S. Dapprich, A. D. Daniels, O. Farkas, J. B. Foresman, J. V. Ortiz, J. Cioslowski and D. J. Fox, Gaussian, Inc., Wallingford CT, 2009.
- xi** A. W. Ehlers, M. Böhme, S. Dapprich, A. Gobbi, A. Höllwarth, V. Jonas, K. F. Köhler, R. Stegmann, A. Veldkamp and G. Frenking, *Chem. Phys. Lett.*, 1993, **208**, 111.

**xii** S. Noury, X. Krokidis, F. Fusterand B. Silvi, *Comput. & Chem.*, 1999, **23**, 597.

**xiii** <http://sites.google.com/site/allouchear/Home/gabedit>.
